# Supplementary material
Source: Springer Nature journal article supplement (https://www.springermedizin.de/resource/supplementary/12943_2013_1121_MOESM2_ESM.pdf/9552532)

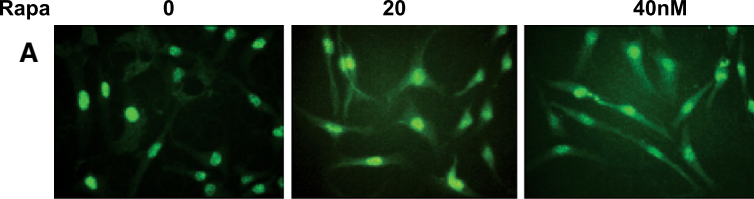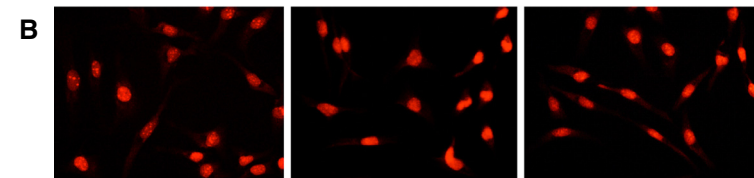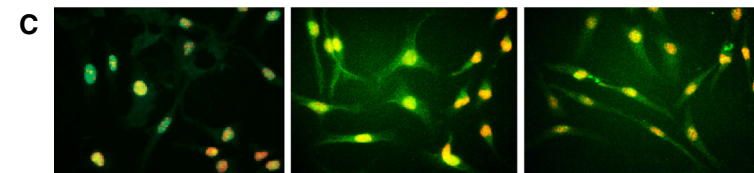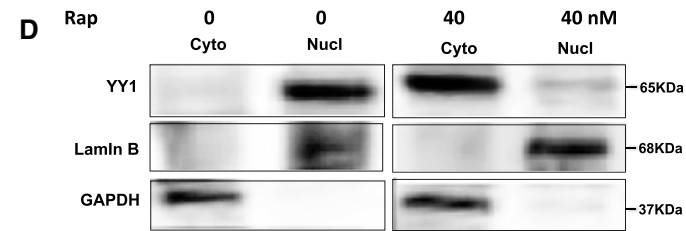

Supplement: MOESM2 [file 9552532]
